# Supplementary material for: Relevance of the Isoflavone Absorption and Testicular Function: A Systematic Review of Preclinical Evidence
Source: Evid Based Complement Alternat Med. 2021 Feb 12;2021:8853172. doi: 10.1155/2021/8853172 (PMC7895610; doi:10.1155/2021/8853172)
Supplement: Supplementary Materials — Table S1: search filters used in PubMed, Scopus, and Web of Science databases. Table S2: characteristics of the experimental models and diet used in all studies that evaluated isoflavone on testicular function. Table S3: description of the main experiment. [file 8853172.f1.zip]

Archive with 3 entries (3 files):
- 8853172.f1/Supplemental Files - S1.docx
- 8853172.f1/Supplemental Files - S2.docx
- 8853172.f1/Supplemental Files - S3.docx
